# Supplementary figures and images for: Interplay between population firing stability and single neuron dynamics in hippocampal networks
Source: eLife journal article supplement (doi:10.7554/elife.04378), 2015-01-03

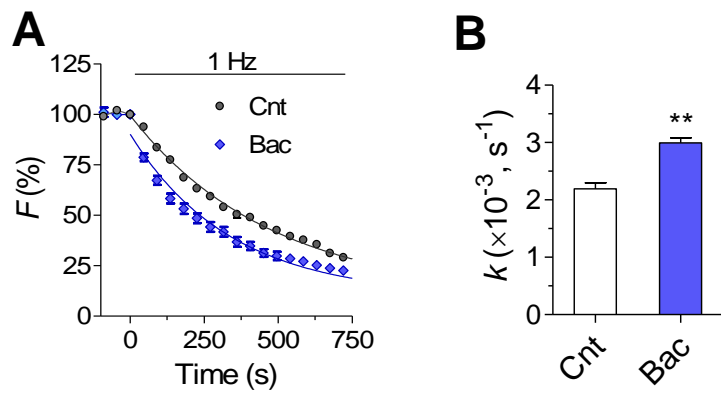

Figure 8 - figure supplement 1

Supplement: supp [file elife-04378-supp-v1.zip]

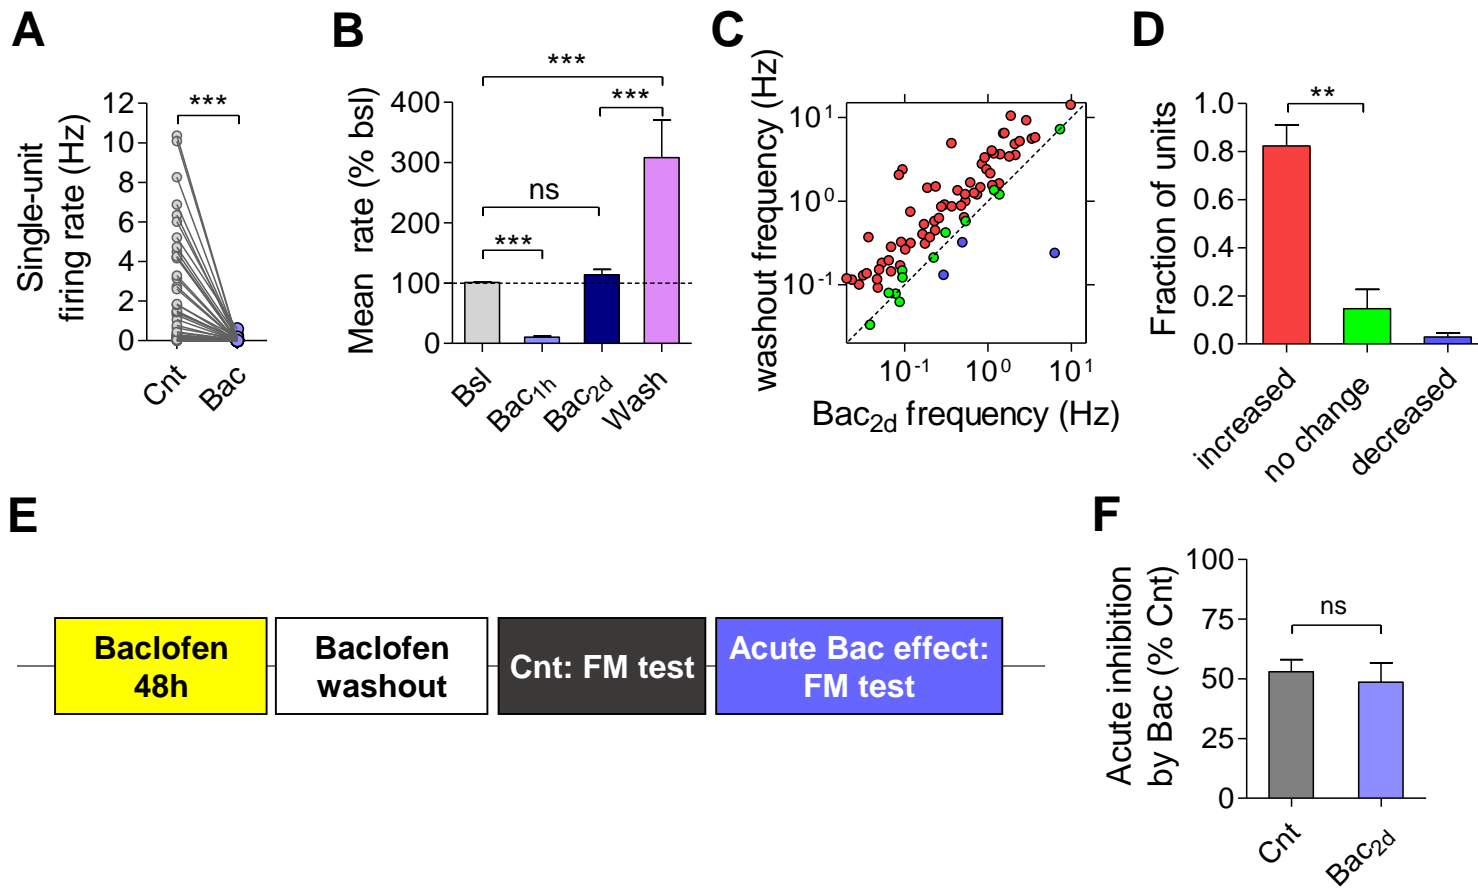

Figure 2 - figure supplement 1

Supplement: supp [file elife-04378-supp-v1.zip]

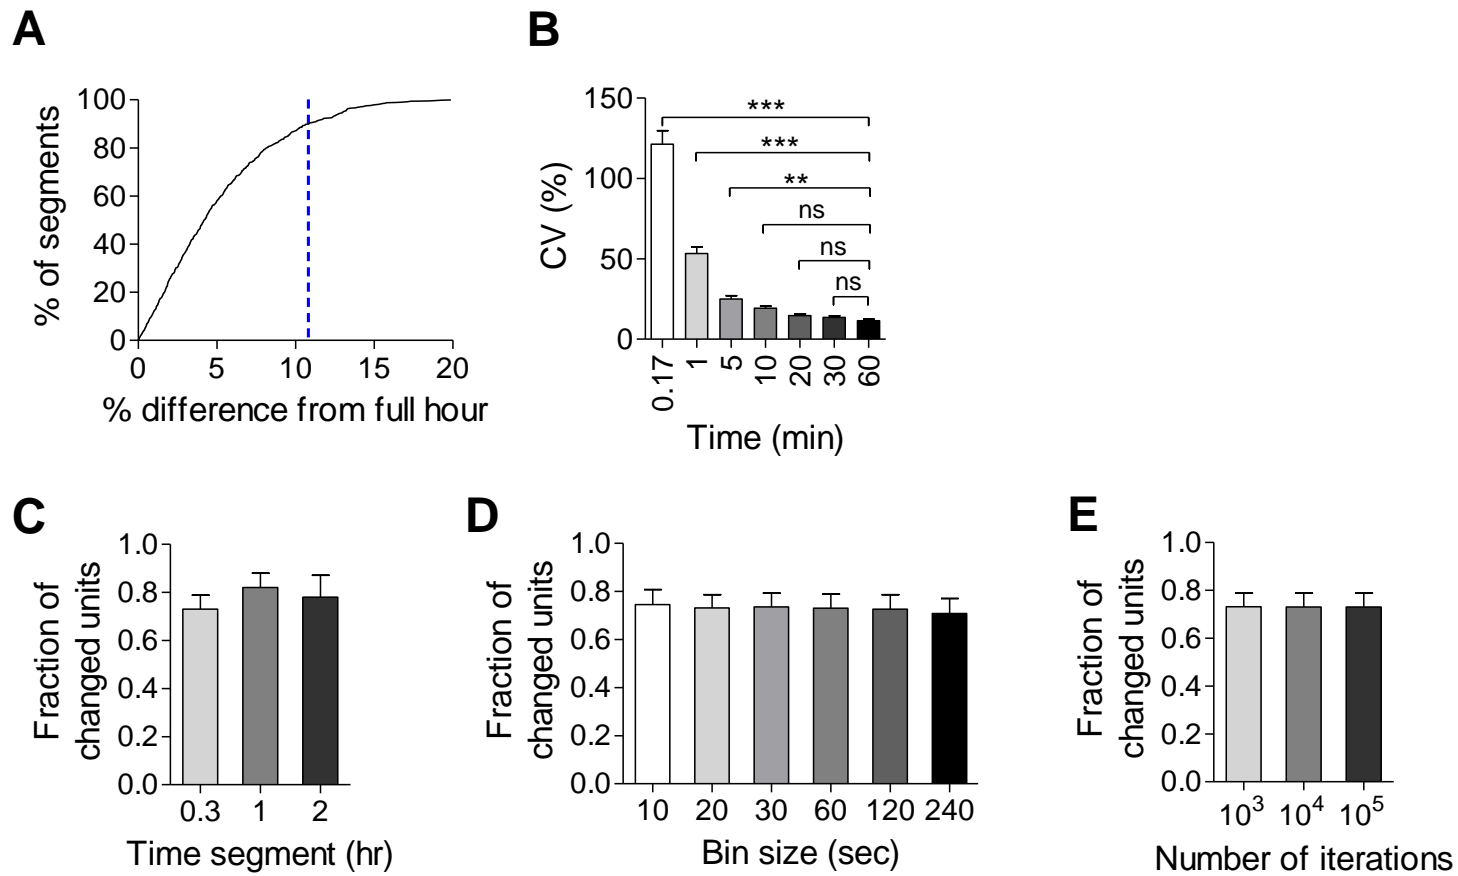

Figure 2 - figure supplement 4

Supplement: supp [file elife-04378-supp-v1.zip]

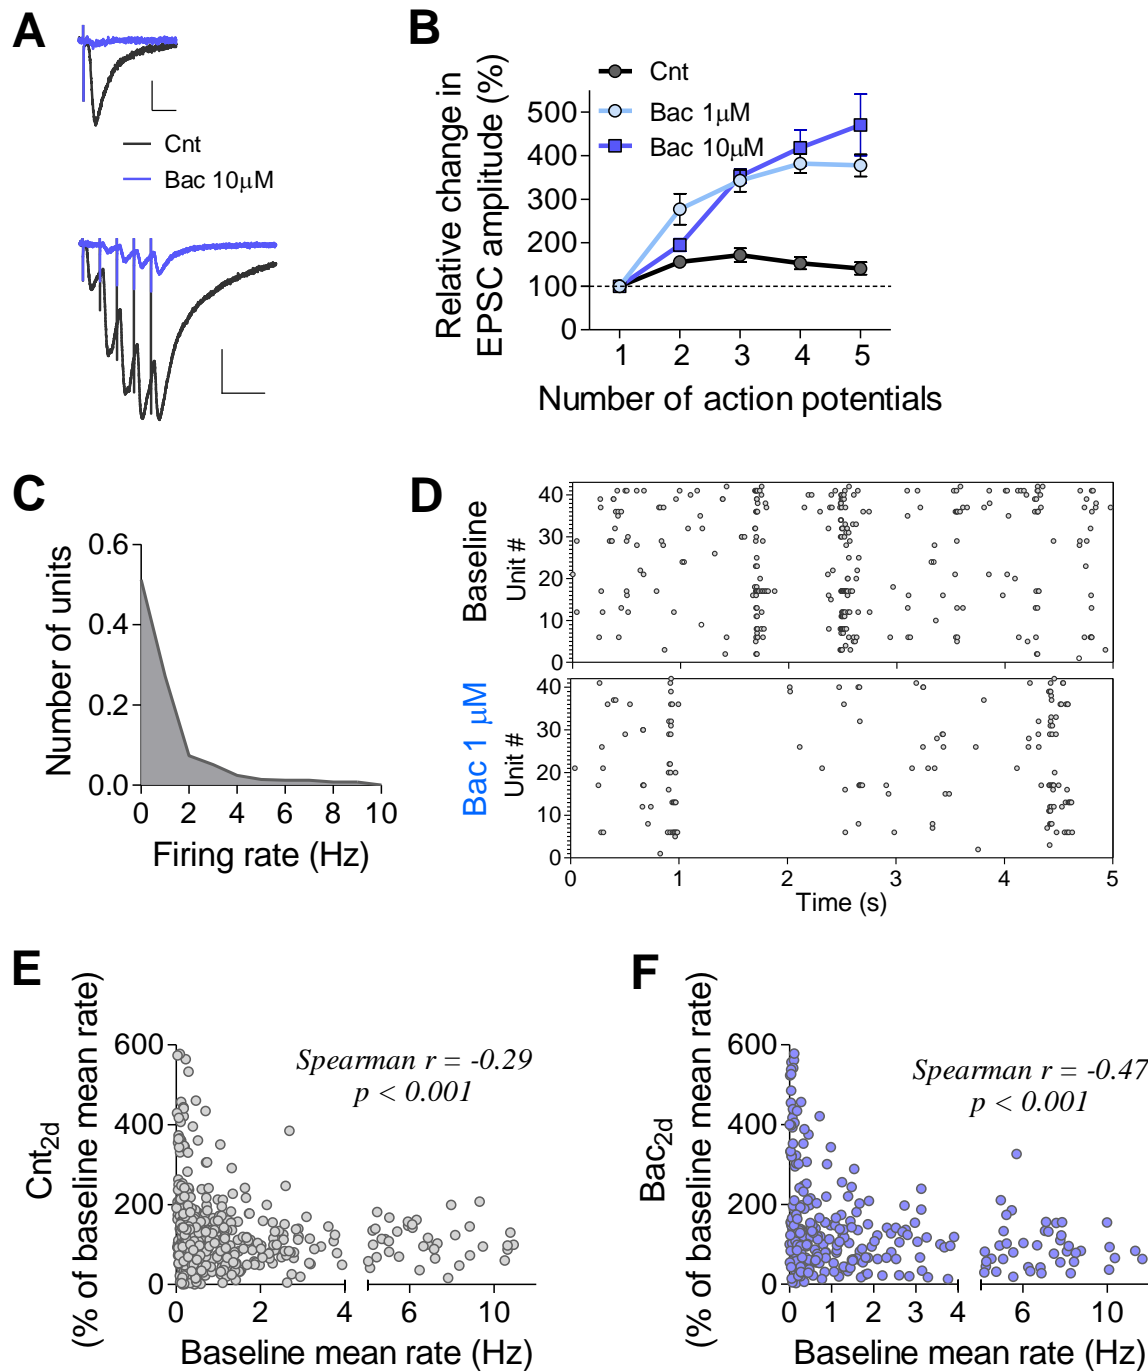

Figure 1 - figure supplement 1

Supplement: supp [file elife-04378-supp-v1.zip]

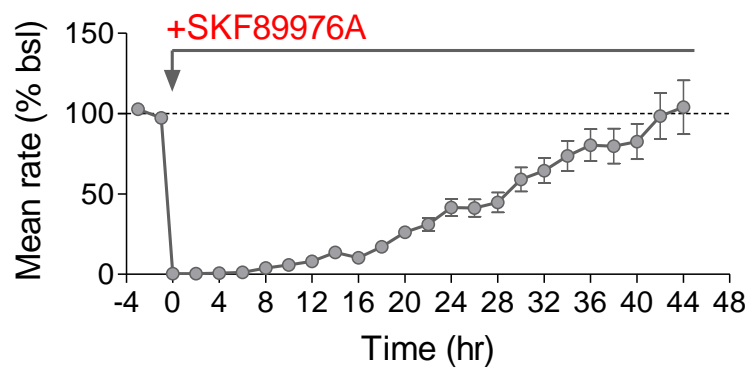

Figure 2 - figure supplement 3

Supplement: supp [file elife-04378-supp-v1.zip]

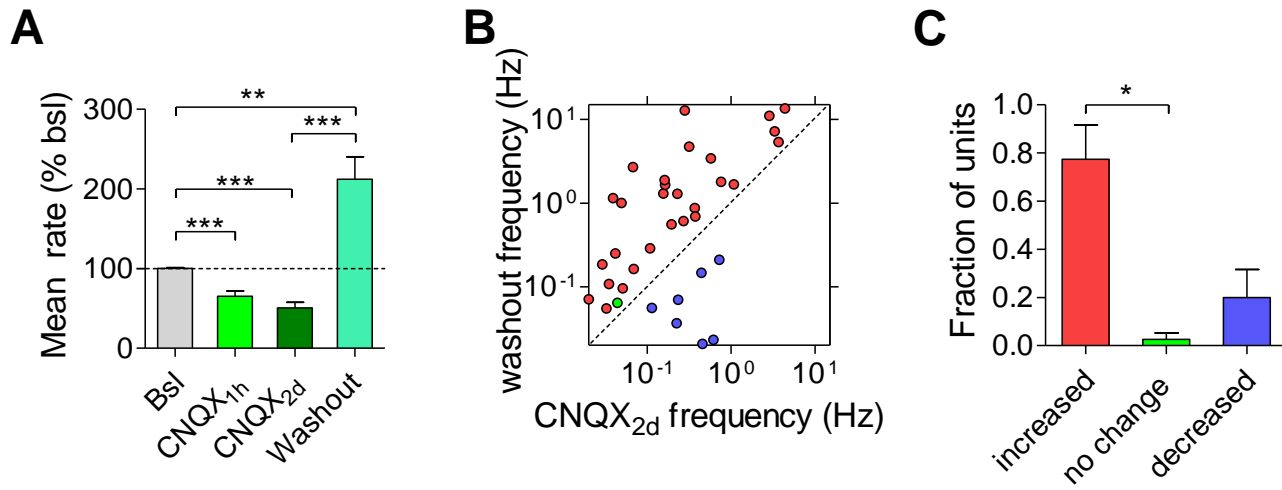

Figure 9 - figure supplement 2

Supplement: supp [file elife-04378-supp-v1.zip]

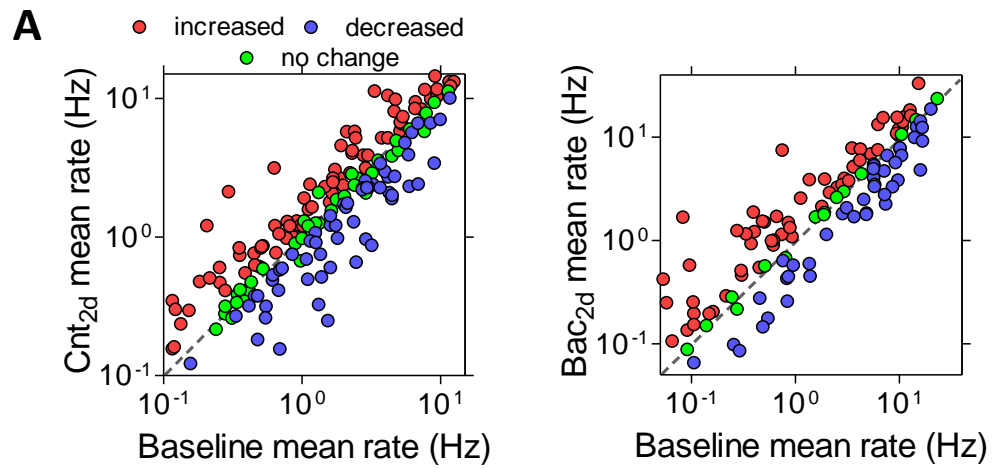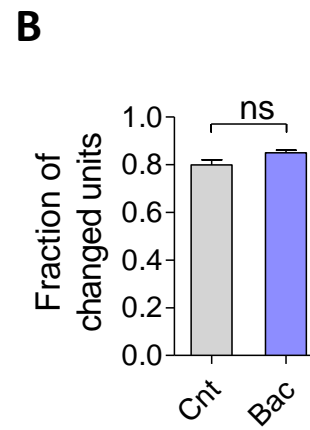

Figure 2 - figure supplement 2

Supplement: supp [file elife-04378-supp-v1.zip]

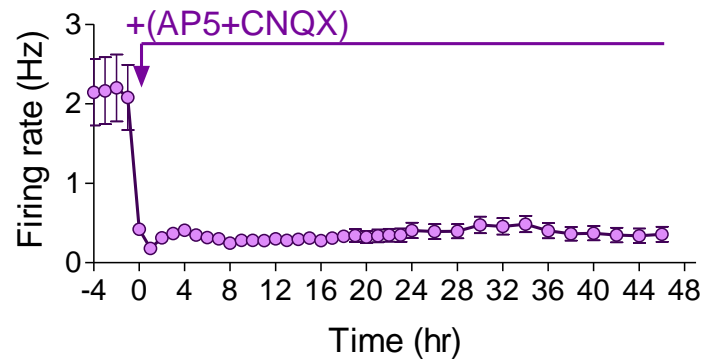

Figure 9 - figure supplement 1

Supplement: supp [file elife-04378-supp-v1.zip]

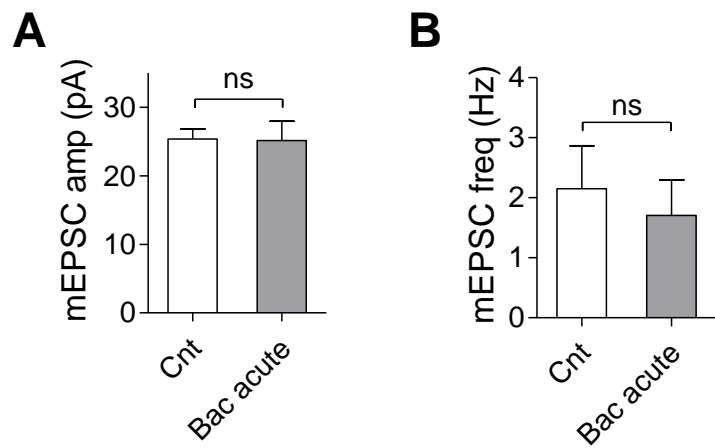

Figure 6 - figure supplement 1

Supplement: supp [file elife-04378-supp-v1.zip]

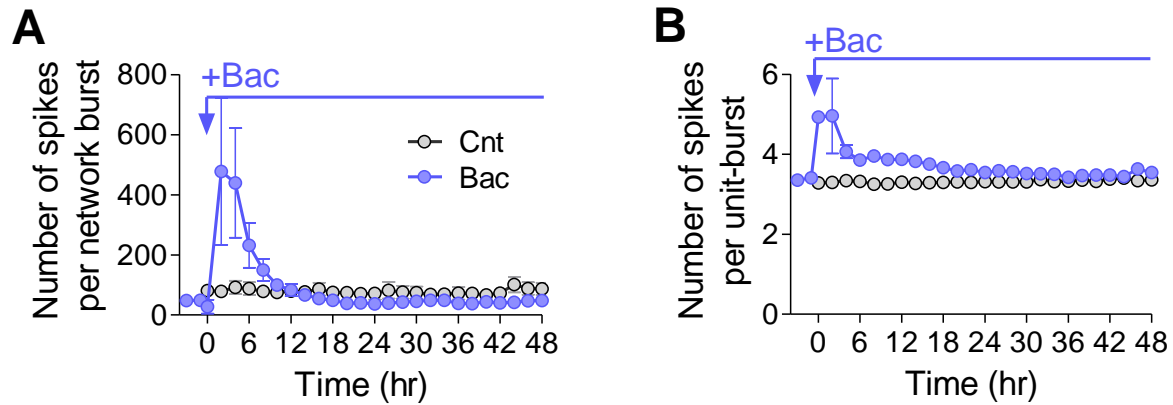

Figure 4 - figure supplement 1

Supplement: supp [file elife-04378-supp-v1.zip]

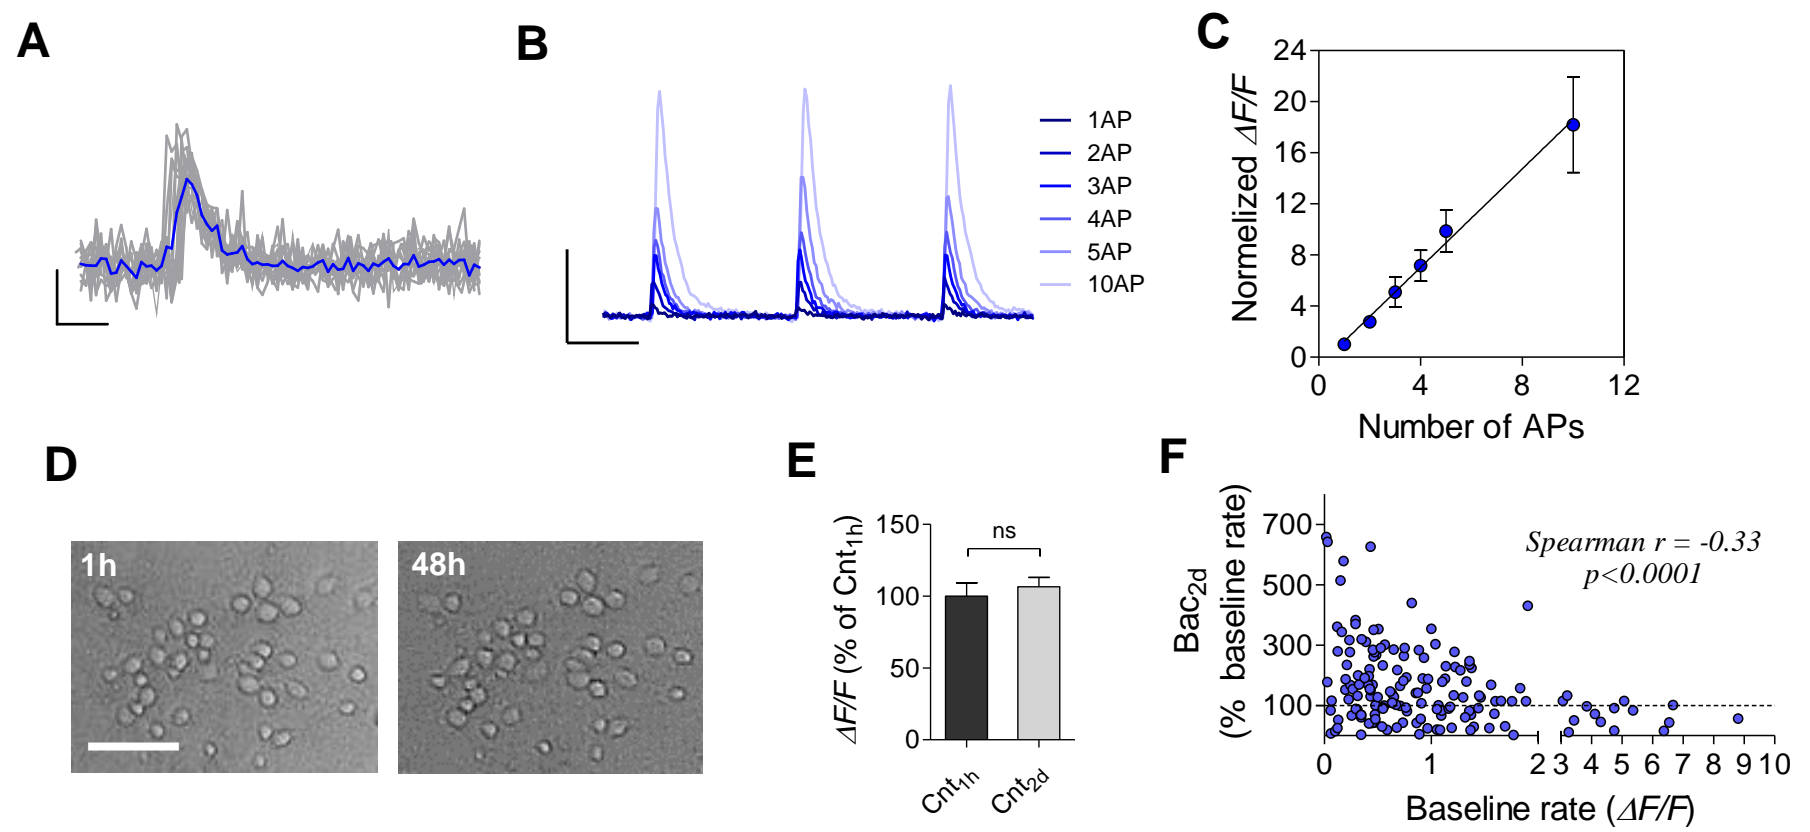

Figure 3 - figure supplement 1

Supplement: supp [file elife-04378-supp-v1.zip]

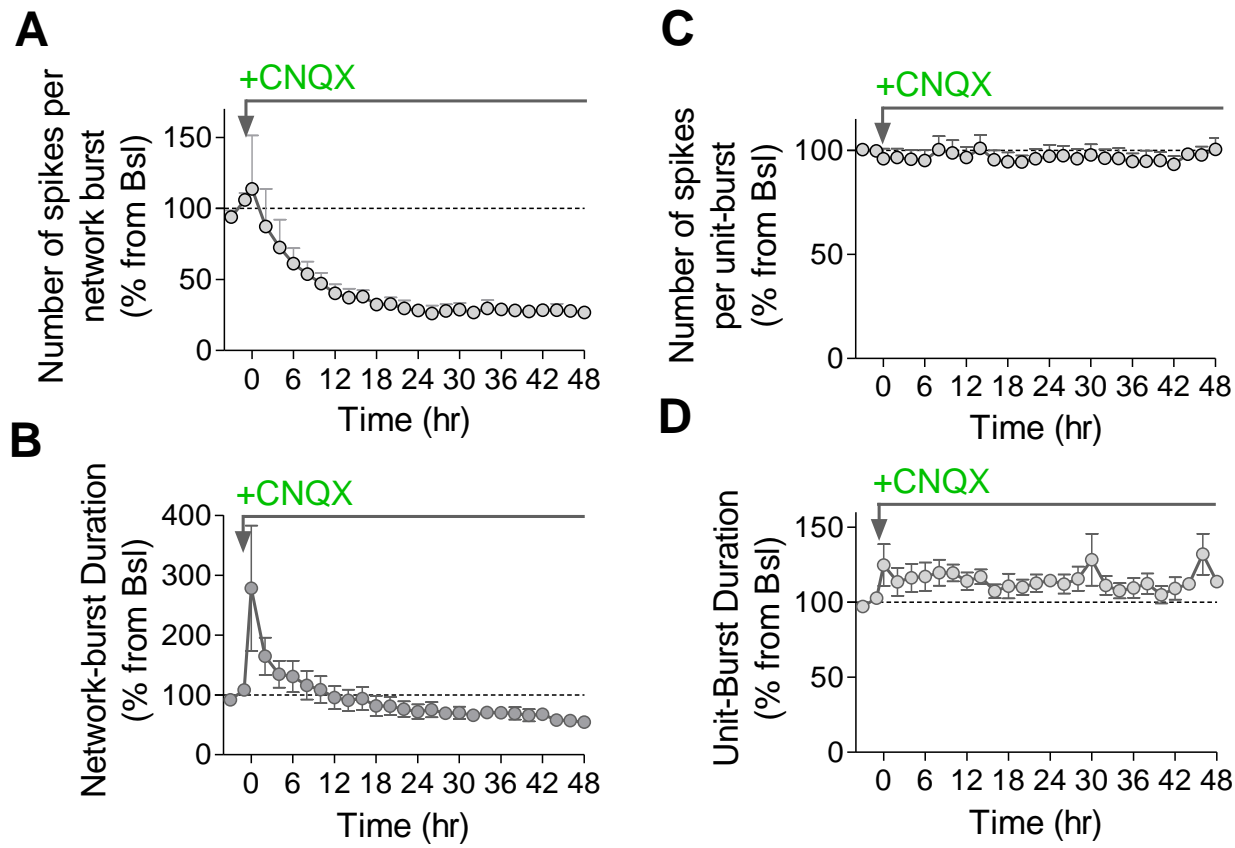

Figure 9 - figure supplement 3

Supplement: supp [file elife-04378-supp-v1.zip]
